# Supplementary material
Source: PubMed Central journal article supplement (PMC3025730)
Supplement: supp_mcq228_mcq228supp.pdf [file supp_mcq228_mcq228supp.pdf]

## SUPPLEMENTARY DATA

TABLE S1. Summary of sample size per treatment

| Population      | Light | Density | Replicates |
|-----------------|-------|---------|------------|
| High Rainfall   | High  | Low     | 5          |
| High Rainfall   | High  | Medium  | 12         |
| High Rainfall   | High  | High    | 6          |
| High Rainfall   | Low   | Low     | 11         |
| High Rainfall   | Low   | Medium  | 14         |
| High Rainfall   | Low   | High    | 13         |
| Medium Rainfall | High  | Low     | 9          |
| Medium Rainfall | High  | Medium  | 8          |
| Medium Rainfall | High  | High    | 7          |
| Medium Rainfall | Low   | Low     | 9          |
| Medium Rainfall | Low   | Medium  | 10         |
| Medium Rainfall | Low   | High    | 11         |
| Low Rainfall    | High  | Low     | 10         |
| Low Rainfall    | High  | Medium  | 15         |
| Low Rainfall    | High  | High    | 13         |
| Low Rainfall    | Low   | Low     | 12         |
| Low Rainfall    | Low   | Medium  | 6          |
| Low Rainfall    | Low   | High    | 10         |

TABLE S2. Levene's test of equality of error variances

|           | <i>F</i> -value | d.f.1 | d.f.2 | <i>P</i> -value |
|-----------|-----------------|-------|-------|-----------------|
| HtoD      | 2.391           | 17    | 157   | 0.003           |
| Internode | 1.096           | 17    | 157   | 0.362           |
| StMR      | 2.156           | 17    | 157   | 0.007           |
| RMR       | 1.302           | 17    | 157   | 0.197           |
| LMR       | 0.881           | 17    | 157   | 0.597           |
| LAR       | 0.982           | 17    | 157   | 0.481           |
| NAR       | 1.019           | 17    | 157   | 0.441           |
| SLA       | 0.935           | 17    | 157   | 0.535           |

TABLE S3. Full ANOVA table for number of nodes with a compound leaf (i.e. heteroblastic development)

| Source                                     | SS      | d.f. | MSS    | F-value | P-value                |
|--------------------------------------------|---------|------|--------|---------|------------------------|
| Corrected model                            | 72.894  | 17   | 4.288  | 8.550   | $2.42 \times 10^{-15}$ |
| Intercept                                  | 4.891   | 1    | 4.891  | 9.753   | 0.0021                 |
| Population                                 | 43.598  | 2    | 21.799 | 43.466  | $7.43 \times 10^{-16}$ |
| Light                                      | 17.412  | 1    | 17.412 | 34.719  | $2.12 \times 10^{-8}$  |
| Density                                    | 8.686   | 2    | 4.343  | 8.660   | 0.0003                 |
| Population $\times$ Light                  | 0.549   | 2    | 0.274  | 0.547   | 0.5797                 |
| Population $\times$ Density                | 3.781   | 4    | 0.945  | 1.885   | 0.1156                 |
| Light $\times$ Density                     | 1.871   | 2    | 0.936  | 1.865   | 0.1581                 |
| Population $\times$ Light $\times$ Density | 0.968   | 4    | 0.242  | 0.483   | 0.7484                 |
| Error                                      | 81.748  | 163  | 0.502  |         |                        |
| Total                                      | 165.839 | 181  |        |         |                        |
| Corrected Total                            | 154.641 | 180  |        |         |                        |

TABLE S4. Full ANOVA table for shade-avoidance traits

| Source          | Trait     | SS      | d.f. | MSS    | F-value | P-value                |
|-----------------|-----------|---------|------|--------|---------|------------------------|
| Corrected Model | HtoD      | 108.083 | 17   | 6.358  | 20.092  | $4.26 \times 10^{-31}$ |
|                 | Internode | 100.598 | 17   | 5.918  | 15.438  | $1.70 \times 10^{-25}$ |
|                 | StMR      | 68.508  | 17   | 4.030  | 7.032   | $1.81 \times 10^{-12}$ |
|                 | RMR       | 26.933  | 17   | 1.584  | 1.814   | 0.0305                 |
|                 | LMR       | 27.253  | 17   | 1.603  | 1.967   | 0.0163                 |
|                 | LAR       | 55.612  | 17   | 3.271  | 4.828   | $3.15 \times 10^{-8}$  |
|                 | NAR       | 38.456  | 17   | 2.262  | 2.914   | 0.0002                 |
|                 | SLA       | 67.714  | 17   | 3.983  | 6.232   | $5.72 \times 10^{-11}$ |
| Intercept       | HtoD      | 0.172   | 1    | 0.172  | 0.545   | 0.4615                 |
|                 | Internode | 0.006   | 1    | 0.006  | 0.017   | 0.8977                 |
|                 | StMR      | 0.003   | 1    | 0.003  | 0.005   | 0.9455                 |
|                 | RMR       | 0.100   | 1    | 0.100  | 0.114   | 0.7361                 |
|                 | LMR       | 0.097   | 1    | 0.097  | 0.119   | 0.7302                 |
|                 | LAR       | 0.126   | 1    | 0.126  | 0.185   | 0.6675                 |
|                 | NAR       | 0.197   | 1    | 0.197  | 0.253   | 0.6154                 |
|                 | SLA       | 0.652   | 1    | 0.652  | 1.020   | 0.3140                 |
| Population      | HtoD      | 28.024  | 2    | 14.012 | 44.280  | $5.63 \times 10^{-16}$ |
|                 | Internode | 33.834  | 2    | 16.917 | 44.134  | $6.18 \times 10^{-16}$ |
|                 | StMR      | 19.282  | 2    | 9.641  | 16.824  | $2.40 \times 10^{-7}$  |
|                 | RMR       | 4.906   | 2    | 2.453  | 2.808   | 0.0633                 |
|                 | LMR       | 2.512   | 2    | 1.256  | 1.541   | 0.2173                 |
|                 | LAR       | 8.228   | 2    | 4.114  | 6.072   | 0.0029                 |
|                 | NAR       | 1.525   | 2    | 0.763  | 0.982   | 0.3767                 |
|                 | SLA       | 6.639   | 2    | 3.320  | 5.194   | 0.0065                 |
| Light           | HtoD      | 52.708  | 1    | 52.708 | 166.570 | $1.95 \times 10^{-26}$ |
|                 | Internode | 38.625  | 1    | 38.625 | 100.767 | $1.26 \times 10^{-18}$ |
|                 | StMR      | 14.603  | 1    | 14.603 | 25.482  | $1.22 \times 10^{-6}$  |

|                                            |           |         |     |        |        |                        |
|--------------------------------------------|-----------|---------|-----|--------|--------|------------------------|
|                                            | RMR       | 10.930  | 1   | 10.930 | 12.512 | 0.0005                 |
|                                            | LMR       | 0.069   | 1   | 0.069  | 0.084  | 0.7720                 |
|                                            | LAR       | 31.050  | 1   | 31.050 | 45.830 | $2.43 \times 10^{-10}$ |
|                                            | NAR       | 18.439  | 1   | 18.439 | 23.751 | $2.66 \times 10^{-6}$  |
|                                            | SLA       | 53.127  | 1   | 53.127 | 83.117 | $3.50 \times 10^{-16}$ |
| Density                                    | HtoD      | 0.967   | 2   | 0.484  | 1.528  | 0.2201                 |
|                                            | Internode | 0.008   | 2   | 0.004  | 0.010  | 0.9903                 |
|                                            | StMR      | 17.492  | 2   | 8.746  | 15.262 | $8.77 \times 10^{-7}$  |
|                                            | RMR       | 0.578   | 2   | 0.289  | 0.331  | 0.7187                 |
|                                            | LMR       | 13.251  | 2   | 6.625  | 8.131  | 0.0004                 |
|                                            | LAR       | 8.932   | 2   | 4.466  | 6.592  | 0.0018                 |
|                                            | NAR       | 8.127   | 2   | 4.064  | 5.234  | 0.0063                 |
|                                            | SLA       | 1.666   | 2   | 0.833  | 1.303  | 0.2747                 |
| Population $\times$ Light                  | HtoD      | 0.042   | 2   | 0.021  | 0.066  | 0.9363                 |
|                                            | Internode | 0.076   | 2   | 0.038  | 0.099  | 0.9057                 |
|                                            | StMR      | 2.317   | 2   | 1.159  | 2.022  | 0.1359                 |
|                                            | RMR       | 0.519   | 2   | 0.260  | 0.297  | 0.7432                 |
|                                            | LMR       | 2.110   | 2   | 1.055  | 1.295  | 0.2769                 |
|                                            | LAR       | 6.040   | 2   | 3.020  | 4.457  | 0.0131                 |
|                                            | NAR       | 3.670   | 2   | 1.835  | 2.364  | 0.0974                 |
|                                            | SLA       | 4.838   | 2   | 2.419  | 3.784  | 0.0248                 |
| Population $\times$ Density                | HtoD      | 2.593   | 4   | 0.648  | 2.049  | 0.0901                 |
|                                            | Internode | 4.075   | 4   | 1.019  | 2.658  | 0.0349                 |
|                                            | StMR      | 1.134   | 4   | 0.283  | 0.494  | 0.7398                 |
|                                            | RMR       | 2.860   | 4   | 0.715  | 0.819  | 0.5151                 |
|                                            | LMR       | 3.617   | 4   | 0.904  | 1.110  | 0.3540                 |
|                                            | LAR       | 0.298   | 4   | 0.074  | 0.110  | 0.9789                 |
|                                            | NAR       | 2.553   | 4   | 0.638  | 0.822  | 0.5128                 |
|                                            | SLA       | 1.532   | 4   | 0.383  | 0.599  | 0.6637                 |
| Light $\times$ Density                     | HtoD      | 0.731   | 2   | 0.365  | 1.154  | 0.3179                 |
|                                            | Internode | 1.476   | 2   | 0.738  | 1.926  | 0.1492                 |
|                                            | StMR      | 1.674   | 2   | 0.837  | 1.461  | 0.2352                 |
|                                            | RMR       | 1.547   | 2   | 0.774  | 0.886  | 0.4145                 |
|                                            | LMR       | 1.816   | 2   | 0.908  | 1.114  | 0.3308                 |
|                                            | LAR       | 1.008   | 2   | 0.504  | 0.744  | 0.4770                 |
|                                            | NAR       | 1.892   | 2   | 0.946  | 1.219  | 0.2984                 |
|                                            | SLA       | 0.082   | 2   | 0.041  | 0.064  | 0.9377                 |
| Population $\times$ Light $\times$ Density | HtoD      | 2.491   | 4   | 0.623  | 1.968  | 0.1020                 |
|                                            | Internode | 0.822   | 4   | 0.205  | 0.536  | 0.7095                 |
|                                            | StMR      | 0.511   | 4   | 0.128  | 0.223  | 0.9253                 |
|                                            | RMR       | 3.116   | 4   | 0.779  | 0.892  | 0.4704                 |
|                                            | LMR       | 4.113   | 4   | 1.028  | 1.262  | 0.2874                 |
|                                            | LAR       | 3.516   | 4   | 0.879  | 1.297  | 0.2735                 |
|                                            | NAR       | 4.324   | 4   | 1.081  | 1.393  | 0.2390                 |
|                                            | SLA       | 1.792   | 4   | 0.448  | 0.701  | 0.5925                 |
| Error                                      | HtoD      | 49.680  | 157 | 0.316  |        |                        |
|                                            | Internode | 60.179  | 157 | 0.383  |        |                        |
|                                            | StMR      | 89.971  | 157 | 0.573  |        |                        |
|                                            | RMR       | 137.143 | 157 | 0.874  |        |                        |
|                                            | LMR       | 127.932 | 157 | 0.815  |        |                        |
|                                            | LAR       | 106.369 | 157 | 0.678  |        |                        |

|                 |           |         |     |       |
|-----------------|-----------|---------|-----|-------|
| Total           | NAR       | 121.883 | 157 | 0.776 |
|                 | SLA       | 100.351 | 157 | 0.639 |
|                 | HtoD      | 157.919 | 175 |       |
|                 | Internode | 160.846 | 175 |       |
|                 | StMR      | 158.480 | 175 |       |
|                 | RMR       | 164.205 | 175 |       |
|                 | LMR       | 155.330 | 175 |       |
|                 | LAR       | 161.992 | 175 |       |
| Corrected Total | NAR       | 160.394 | 175 |       |
|                 | SLA       | 168.101 | 175 |       |
|                 | HtoD      | 157.763 | 174 |       |
|                 | Internode | 160.777 | 174 |       |
|                 | StMR      | 158.479 | 174 |       |
|                 | RMR       | 164.076 | 174 |       |
|                 | LMR       | 155.185 | 174 |       |
|                 | LAR       | 161.981 | 174 |       |
|                 | NAR       | 160.339 | 174 |       |
|                 | SLA       | 168.066 | 174 |       |

TABLE S5. Full ANOVA tables for (a) relative growth rate, (b) relative height growth; and (c) total plant dry weight at time of harvest

(a) Relative growth rate

| Source                       | SS      | d.f. | MSS   | <i>F</i> -value | <i>P</i> -value |
|------------------------------|---------|------|-------|-----------------|-----------------|
| Corrected Model              | 28.118  | 17   | 1.654 | 1.872           | 0.0238          |
| Intercept                    | 0.269   | 1    | 0.269 | 0.305           | 0.5816          |
| Population                   | 6.456   | 2    | 3.228 | 3.654           | 0.0280          |
| Light                        | 3.352   | 1    | 3.352 | 3.793           | 0.0532          |
| Density                      | 12.683  | 2    | 6.342 | 7.177           | 0.0010          |
| Population × Light           | 1.264   | 2    | 0.632 | 0.715           | 0.4906          |
| Population × Density         | 4.674   | 4    | 1.169 | 1.323           | 0.2638          |
| Light × Density              | 0.146   | 2    | 0.073 | 0.082           | 0.9210          |
| Population × Light × Density | 2.567   | 4    | 0.642 | 0.726           | 0.5752          |
| Error                        | 144.021 | 163  | 0.884 |                 |                 |
| Total                        | 172.139 | 181  |       |                 |                 |
| Corrected Total              | 172.139 | 180  |       |                 |                 |

(b) Relative height growth

| Source                       | SS     | d.f. | MSS    | <i>F</i> -value | <i>P</i> -value        |
|------------------------------|--------|------|--------|-----------------|------------------------|
| Corrected Model              | 65.550 | 17   | 3.856  | 5.892           | $2.07 \times 10^{-10}$ |
| Intercept                    | 0.018  | 1    | 0.018  | 0.028           | 0.8685                 |
| Population                   | 22.399 | 2    | 11.200 | 17.114          | $1.79 \times 10^{-7}$  |
| Light                        | 16.932 | 1    | 16.932 | 25.875          | $9.93 \times 10^{-7}$  |
| Density                      | 6.367  | 2    | 3.184  | 4.865           | 0.0089                 |
| Population × Light           | 0.154  | 2    | 0.077  | 0.118           | 0.8888                 |
| Population × Density         | 5.201  | 4    | 1.300  | 1.987           | 0.0989                 |
| Light × Density              | 3.165  | 2    | 1.583  | 2.418           | 0.0922                 |
| Population × Light × Density | 1.929  | 4    | 0.482  | 0.737           | 0.5679                 |

|                 |         |     |       |
|-----------------|---------|-----|-------|
| Error           | 106.666 | 163 | 0.654 |
| Total           | 172.216 | 181 |       |
| Corrected Total | 172.216 | 180 |       |

(c) Total plant dry weight at time of harvest

| Source                                     | SS      | d.f. | MSS    | <i>F</i> -value | <i>P</i> -value       |
|--------------------------------------------|---------|------|--------|-----------------|-----------------------|
| Corrected Model                            | 42.254  | 17   | 2.486  | 3.117           | 0.0001                |
| Intercept                                  | 0.049   | 1    | 0.049  | 0.061           | 0.8047                |
| Population                                 | 4.366   | 2    | 2.183  | 2.738           | 0.0677                |
| Light                                      | 1.674   | 1    | 1.674  | 2.100           | 0.1492                |
| Density                                    | 24.835  | 2    | 12.417 | 15.574          | $6.46 \times 10^{-7}$ |
| Population $\times$ Light                  | 1.631   | 2    | 0.816  | 1.023           | 0.3618                |
| Population $\times$ Density                | 2.648   | 4    | 0.662  | 0.830           | 0.5076                |
| Light $\times$ Density                     | 1.675   | 2    | 0.837  | 1.050           | 0.3522                |
| Population $\times$ Light $\times$ Density | 4.759   | 4    | 1.190  | 1.492           | 0.2069                |
| Error                                      | 129.959 | 163  | 0.797  |                 |                       |
| Total                                      | 172.213 | 181  |        |                 |                       |
| Corrected Total                            | 172.213 | 180  |        |                 |                       |
